# Supplementary material for: Physicochemical Characterization of Thermally Treated Chitosans and Chitosans Obtained by Alkaline Deacetylation
Source: Hindawi journal article supplement (doi:10.1155/2014/853572), 2014-01-01
Supplement: f1 [file 853572.f1.pdf]

## SUPPLEMENTARY MATERIAL

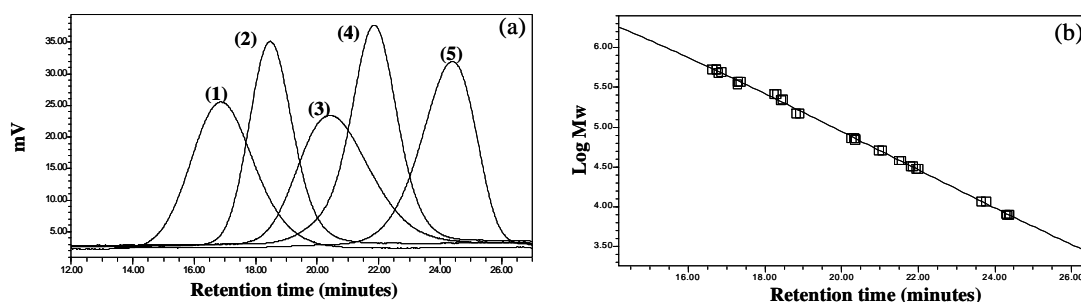

**Figure 1S:** Chromatograms (a) and calibration curve (b) of GPC-RI for the dextran standards (1) DXT530K  $M_w=5.34 \times 10^5 \text{ g mol}^{-1}$ ; (2) DXT260K  $M_w=2.61 \times 10^5 \text{ g mol}^{-1}$ ; (3) DXT72K  $M_w=7.27 \times 10^4 \text{ g mol}^{-1}$ ; (4) DXT38K  $M_w=3.82 \times 10^4 \text{ g mol}^{-1}$ ; (5) DXT11K  $M_w=1.17 \times 10^4 \text{ g mol}^{-1}$ .

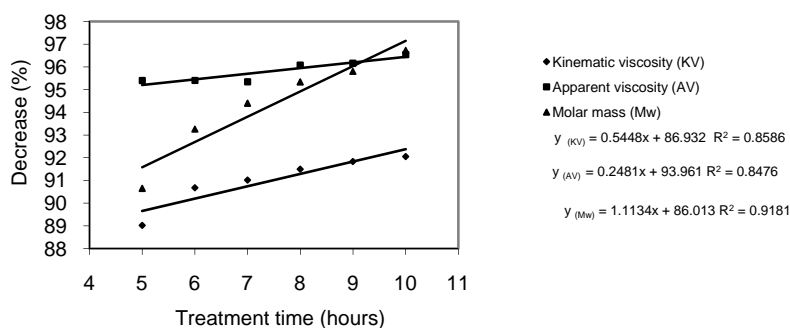

**Figure 2S:** Decrease in kinematic and apparent viscosities and molar masses of chitosans in solid state thermally degraded at  $100^\circ\text{C}$  for a period of 5 to 10 hours ( $p \leq 0.05$ ).

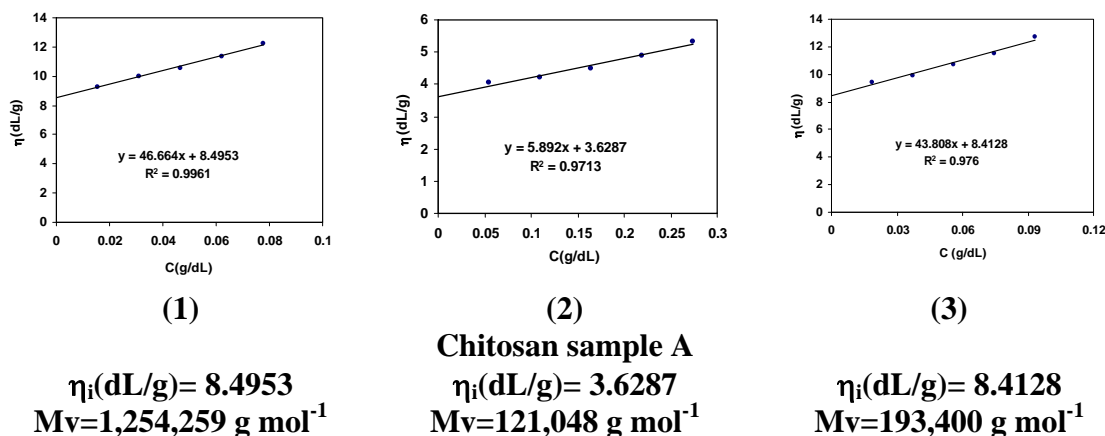

**Figure 3S:** Linear regressions to obtain the limiting viscosity number by extrapolation of Mark-Houwink's relationship between intrinsic viscosity and chitosan concentration of control sample (A) and  $M_v$  values using solvents 1, 2 and 3.

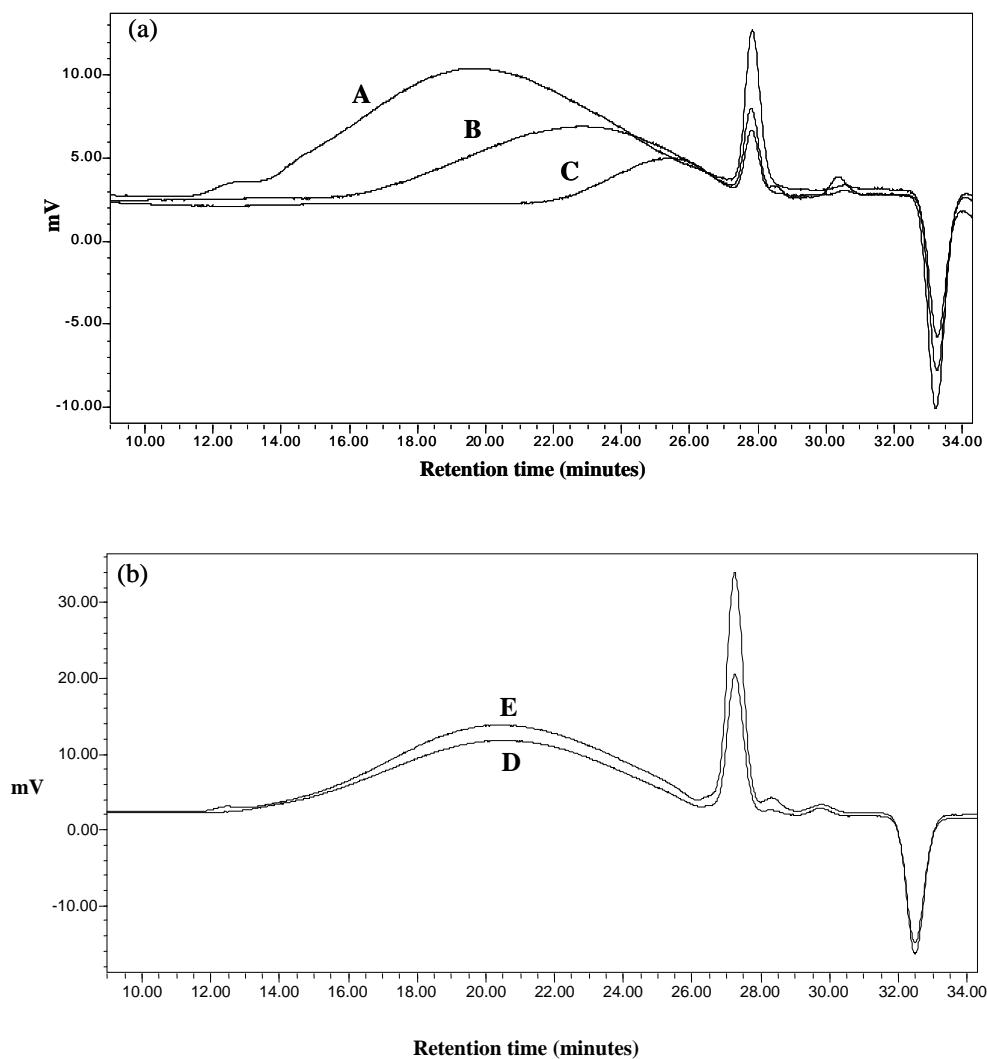

**Figure 4S:** Chromatographic profiles obtained by GPC-RI for chitosans: (a) without thermal treatment A, and thermally treated for 3 hours B and 10 hours C at 100°C and (b) chitosans D and E, obtained by alkaline deacetylation (Table 2).

**Table 1S:** Decrease in kinematic and apparent viscosities and molar mass of chitosans in solid state thermally degraded at 100°C for 10 hours ( $p \leq 0.05$ ).

| Time (hours) | Decrease (%)             |                         |                   |
|--------------|--------------------------|-------------------------|-------------------|
|              | Kinematic viscosity (KV) | Apparent viscosity (AV) | Molar mass (Mw)   |
| 0            | 0 <sup>a</sup>           | 0 <sup>a</sup>          | 0 <sup>a</sup>    |
| 1            | 34.1 <sup>b</sup>        | 13.3 <sup>b</sup>       | 4.1 <sup>b</sup>  |
| 2            | 52.2 <sup>c</sup>        | 44.9 <sup>c</sup>       | 33.7 <sup>c</sup> |
| 3            | 80.5 <sup>d</sup>        | 83.7 <sup>d</sup>       | 73.4 <sup>d</sup> |
| 4            | 86.6 <sup>e</sup>        | 92.5 <sup>e</sup>       | 81.8 <sup>e</sup> |
| 5            | 89.0 <sup>f</sup>        | 95.4 <sup>e</sup>       | 90.6 <sup>f</sup> |
| 6            | 90.7 <sup>g</sup>        | 95.4 <sup>e</sup>       | 93.3 <sup>g</sup> |
| 7            | 91.0 <sup>h</sup>        | 95.3 <sup>e</sup>       | 94.4 <sup>g</sup> |
| 8            | 91.5 <sup>i</sup>        | 96.1 <sup>e</sup>       | 95.3 <sup>h</sup> |
| 9            | 91.8 <sup>j</sup>        | 96.2 <sup>e</sup>       | 95.8 <sup>h</sup> |
| 10           | 92.0 <sup>j</sup>        | 96.5 <sup>e</sup>       | 96.7 <sup>h</sup> |

Different letters in the same column indicate significant differences between the means obtained with the Tukey test ( $p \leq 0.05$ ).

**Table 2S:** Decrease (%) in average molar mass (Mw), viscosity average molar mass (Mv) and apparent and kinematic viscosities of chitosan in solid state, thermally treated at 100°C

| Code | Treatment time (hours) | Decrease (%) |      |                    |                     |
|------|------------------------|--------------|------|--------------------|---------------------|
|      |                        | Mw           | Mv   | Apparent viscosity | Kinematic viscosity |
| A    | 0                      | 0            | 0    | 0                  | 0                   |
| B    | 3                      | 73.4         | 52.9 | 92.3               | 86.3                |
| C    | 10                     | 96.7         | 94.5 | 95.3               | 91.4                |
